# Supplementary material
Source: PubMed Central journal article supplement (PMC3099267)
Supplement: NIHMS284323-supplement-01.pdf [file NIHMS284323-supplement-01.pdf]

## DATA AND ANALYSES

### Comparison 1. Acupuncture vs. no acupuncture

| Outcome or subgroup title                      | No. of studies | No. of participants | Statistical method                        | Effect size          |
|------------------------------------------------|----------------|---------------------|-------------------------------------------|----------------------|
| 1 Response                                     | 4              |                     | Risk Ratio (M-H, Random, 95% CI)          | Subtotals only       |
| 1.1 Up to 8 weeks/2 months after randomization | 1              | 221                 | Risk Ratio (M-H, Random, 95% CI)          | 1.99 [1.30, 3.03]    |
| 1.2 3 to 4 months after randomization          | 4              | 2376                | Risk Ratio (M-H, Random, 95% CI)          | 2.33 [2.02, 2.69]    |
| 1.3 5 to 6 months after randomization          | 0              | 0                   | Risk Ratio (M-H, Random, 95% CI)          | Not estimable        |
| 1.4 > 6 months after randomization             | 1              | 401                 | Risk Ratio (M-H, Random, 95% CI)          | 2.23 [1.39, 3.58]    |
| 2 Headache frequency (various measures)        | 5              |                     | Std. Mean Difference (IV, Random, 95% CI) | Subtotals only       |
| 2.1 Up to 8 weeks/2 months after randomization | 2              | 218                 | Std. Mean Difference (IV, Random, 95% CI) | -0.44 [-0.74, -0.14] |
| 2.2 3 to 4 months after randomization          | 4              | 2087                | Std. Mean Difference (IV, Random, 95% CI) | -0.43 [-0.60, -0.27] |
| 2.3 5 to 6 months after randomization          | 0              | 0                   | Std. Mean Difference (IV, Random, 95% CI) | Not estimable        |
| 2.4 > 6 months after randomization             | 1              | 301                 | Std. Mean Difference (IV, Random, 95% CI) | -0.29 [-0.52, -0.06] |
| 3 Migraine attacks                             | 2              |                     | Mean Difference (IV, Random, 95% CI)      | Subtotals only       |
| 3.1 Up to 8 weeks/2 months after randomization | 1              | 197                 | Mean Difference (IV, Random, 95% CI)      | -0.70 [-1.07, -0.33] |
| 3.2 3 to 4 months after randomization          | 2              | 219                 | Mean Difference (IV, Random, 95% CI)      | -0.79 [-1.12, -0.47] |
| 3.3 5 to 6 months after randomization          | 0              | 0                   | Mean Difference (IV, Random, 95% CI)      | Not estimable        |
| 3.4 > 6 months after randomization             | 0              | 0                   | Mean Difference (IV, Random, 95% CI)      | Not estimable        |
| 4 Migraine days                                | 2              |                     | Mean Difference (IV, Random, 95% CI)      | Subtotals only       |
| 4.1 Up to 8 weeks/2 months after randomization | 1              | 198                 | Mean Difference (IV, Random, 95% CI)      | -1.50 [-2.31, -0.69] |
| 4.2 3 to 4 months after randomization          | 2              | 220                 | Mean Difference (IV, Random, 95% CI)      | -1.64 [-2.87, -0.41] |
| 4.3 5 to 6 months after randomization          | 0              | 0                   | Mean Difference (IV, Random, 95% CI)      | Not estimable        |
| 4.4 > 6 months after randomization             | 0              | 0                   | Mean Difference (IV, Random, 95% CI)      | Not estimable        |
| 5 Headache days                                | 3              |                     | Mean Difference (IV, Random, 95% CI)      | Subtotals only       |
| 5.1 Up to 8 weeks/2 months after randomization | 1              | 198                 | Mean Difference (IV, Random, 95% CI)      | -0.90 [-2.13, 0.33]  |
| 5.2 3 to 4 months after randomization          | 3              | 2064                | Mean Difference (IV, Random, 95% CI)      | -2.09 [-2.60, -1.58] |

|                                                |   |      |                                           |                      |
|------------------------------------------------|---|------|-------------------------------------------|----------------------|
| 5.3 5 to 6 months after randomization          | 0 | 0    | Mean Difference (IV, Random, 95% CI)      | Not estimable        |
| 5.4 > 6 months after randomization             | 1 | 301  | Mean Difference (IV, Random, 95% CI)      | -2.20 [-3.90, -0.50] |
| 6 Headache intensity                           | 3 |      | Std. Mean Difference (IV, Random, 95% CI) | Subtotals only       |
| 6.1 Up to 8 weeks/2 months after randomization | 1 | 20   | Std. Mean Difference (IV, Random, 95% CI) | Not estimable        |
| 6.2 3 to 4 months after randomization          | 2 | 1652 | Std. Mean Difference (IV, Random, 95% CI) | -0.77 [-0.94, -0.61] |
| 6.3 5 to 6 months after randomization          | 0 | 0    | Std. Mean Difference (IV, Random, 95% CI) | Not estimable        |
| 6.4 > 6 months after randomization             | 0 | 0    | Std. Mean Difference (IV, Random, 95% CI) | Not estimable        |
| 7 Analgesic use                                | 5 |      | Std. Mean Difference (IV, Random, 95% CI) | Subtotals only       |
| 7.1 Up to 8 weeks/2 months after randomization | 2 | 218  | Std. Mean Difference (IV, Random, 95% CI) | -0.29 [-0.59, 0.01]  |
| 7.2 3 to 4 months after randomization          | 4 | 581  | Std. Mean Difference (IV, Random, 95% CI) | -0.52 [-1.22, 0.18]  |
| 7.3 5 to 6 months after randomization          | 1 | 50   | Std. Mean Difference (IV, Random, 95% CI) | -0.25 [-0.82, 0.33]  |
| 7.4 > 6 months after randomization             | 1 | 301  | Std. Mean Difference (IV, Random, 95% CI) | -0.02 [-0.24, 0.21]  |
| 8 Headache scores                              | 3 |      | Std. Mean Difference (IV, Random, 95% CI) | Subtotals only       |
| 8.1 Up to 8 weeks/2 months after randomization | 1 | 198  | Std. Mean Difference (IV, Random, 95% CI) | -0.40 [-0.70, -0.10] |
| 8.2 3 to 4 months after randomization          | 3 | 558  | Std. Mean Difference (IV, Random, 95% CI) | -1.19 [-2.12, -0.25] |
| 8.3 5 to 6 months after randomization          | 1 | 66   | Std. Mean Difference (IV, Random, 95% CI) | -2.81 [-3.50, -2.12] |
| 8.4 > 6 months after randomization             | 1 | 301  | Std. Mean Difference (IV, Random, 95% CI) | -0.40 [-0.63, -0.17] |

## Comparison 2. Acupuncture vs. sham interventions

| Outcome or subgroup title                      | No. of studies | No. of participants | Statistical method                        | Effect size       |
|------------------------------------------------|----------------|---------------------|-------------------------------------------|-------------------|
| 1 Response                                     | 13             |                     | Risk Ratio (M-H, Random, 95% CI)          | Subtotals only    |
| 1.1 Up to 8 weeks/2 months after randomization | 7              | 1091                | Risk Ratio (M-H, Random, 95% CI)          | 1.38 [0.96, 1.97] |
| 1.2 3 to 4 months after randomization          | 11             | 1225                | Risk Ratio (M-H, Random, 95% CI)          | 1.13 [0.95, 1.35] |
| 1.3 5 to 6 months after randomization          | 6              | 1054                | Risk Ratio (M-H, Random, 95% CI)          | 1.19 [0.86, 1.63] |
| 1.4 > 6 months after randomization             | 3              | 132                 | Risk Ratio (M-H, Random, 95% CI)          | 1.01 [0.51, 1.99] |
| 2 Headache frequency (various measures)        | 8              |                     | Std. Mean Difference (IV, Random, 95% CI) | Subtotals only    |

|                                                |   |      |                                           |                     |
|------------------------------------------------|---|------|-------------------------------------------|---------------------|
| 2.1 Up to 8 weeks/2 months after randomization | 6 | 895  | Std. Mean Difference (IV, Random, 95% CI) | -0.23 [-0.49, 0.04] |
| 2.2 3 to 4 months after randomization          | 8 | 1012 | Std. Mean Difference (IV, Random, 95% CI) | -0.18 [-0.44, 0.07] |
| 2.3 5 to 6 months after randomization          | 5 | 932  | Std. Mean Difference (IV, Random, 95% CI) | 0.01 [-0.25, 0.28]  |
| 2.4 > 6 months after randomization             | 4 | 150  | Std. Mean Difference (IV, Random, 95% CI) | 0.11 [-0.22, 0.43]  |
| 3 Migraine attacks                             | 5 |      | Mean Difference (IV, Random, 95% CI)      | Subtotals only      |
| 3.1 Up to 8 weeks/2 months after randomization | 4 | 326  | Mean Difference (IV, Random, 95% CI)      | -0.35 [-0.74, 0.04] |
| 3.2 3 to 4 months after randomization          | 5 | 360  | Mean Difference (IV, Random, 95% CI)      | -0.11 [-0.51, 0.30] |
| 3.3 5 to 6 months after randomization          | 4 | 321  | Mean Difference (IV, Random, 95% CI)      | 0.15 [-0.36, 0.65]  |
| 3.4 > 6 months after randomization             | 4 | 150  | Mean Difference (IV, Random, 95% CI)      | 0.30 [-0.10, 0.71]  |
| 4 Migraine days                                | 6 |      | Mean Difference (IV, Random, 95% CI)      | Subtotals only      |
| 4.1 Up to 8 weeks/2 months after randomization | 5 | 864  | Mean Difference (IV, Random, 95% CI)      | -0.80 [-1.70, 0.11] |
| 4.2 3 to 4 months after randomization          | 6 | 951  | Mean Difference (IV, Random, 95% CI)      | -0.27 [-0.98, 0.45] |
| 4.3 5 to 6 months after randomization          | 5 | 928  | Mean Difference (IV, Random, 95% CI)      | -0.17 [-0.82, 0.47] |
| 4.4 > 6 months after randomization             | 4 | 140  | Mean Difference (IV, Random, 95% CI)      | 0.35 [-0.90, 1.60]  |
| 5 Headache days                                | 2 |      | Mean Difference (IV, Random, 95% CI)      | Subtotals only      |
| 5.1 Up to 8 weeks/2 months after randomization | 2 | 240  | Mean Difference (IV, Random, 95% CI)      | -0.47 [-2.31, 1.36] |
| 5.2 3 to 4 months after randomization          | 2 | 238  | Mean Difference (IV, Random, 95% CI)      | -0.12 [-1.41, 1.17] |
| 5.3 5 to 6 months after randomization          | 2 | 233  | Mean Difference (IV, Random, 95% CI)      | -0.07 [-1.66, 1.52] |
| 5.4 > 6 months after randomization             | 0 | 0    | Mean Difference (IV, Random, 95% CI)      | Not estimable       |
| 6 Headache intensity                           | 3 |      | Std. Mean Difference (IV, Random, 95% CI) | Subtotals only      |
| 6.1 Up to 8 weeks/2 months after randomization | 0 | 0    | Std. Mean Difference (IV, Random, 95% CI) | Not estimable       |
| 6.2 3 to 4 months after randomization          | 3 | 845  | Std. Mean Difference (IV, Random, 95% CI) | 0.06 [-0.07, 0.20]  |
| 6.3 5 to 6 months after randomization          | 3 | 836  | Std. Mean Difference (IV, Random, 95% CI) | -0.06 [-0.37, 0.24] |
| 6.4 > 6 months after randomization             | 1 | 28   | Std. Mean Difference (IV, Random, 95% CI) | -0.37 [-1.12, 0.38] |
| 7 Analgesic use                                | 7 |      | Std. Mean Difference (IV, Random, 95% CI) | Subtotals only      |
| 7.1 Up to 8 weeks/2 months after randomization | 5 | 368  | Std. Mean Difference (IV, Random, 95% CI) | -0.08 [-0.29, 0.14] |
| 7.2 3 to 4 months after randomization          | 7 | 455  | Std. Mean Difference (IV, Random, 95% CI) | -0.27 [-0.71, 0.16] |
| 7.3 5 to 6 months after randomization          | 6 | 409  | Std. Mean Difference (IV, Random, 95% CI) | -0.56 [-1.57, 0.46] |

|                                                                   |    |      |                                           |                     |
|-------------------------------------------------------------------|----|------|-------------------------------------------|---------------------|
| 7.4 > 6 months after randomization                                | 5  | 171  | Std. Mean Difference (IV, Random, 95% CI) | 0.02 [-0.30, 0.35]  |
| 8 Headache scores                                                 | 4  |      | Std. Mean Difference (IV, Random, 95% CI) | Subtotals only      |
| 8.1 Up to 8 weeks/2 months after randomization                    | 2  | 240  | Std. Mean Difference (IV, Random, 95% CI) | 0.06 [-0.22, 0.34]  |
| 8.2 3 to 4 months after randomization                             | 4  | 327  | Std. Mean Difference (IV, Random, 95% CI) | -0.81 [-2.19, 0.58] |
| 8.3 5 to 6 months after randomization                             | 3  | 291  | Std. Mean Difference (IV, Random, 95% CI) | -1.14 [-3.76, 1.49] |
| 8.4 > 6 months after randomization                                | 1  | 26   | Std. Mean Difference (IV, Random, 95% CI) | Not estimable       |
| 9 Response (for funnel plot)                                      | 13 | 1306 | Risk Ratio (M-H, Fixed, 95% CI)           | 1.19 [1.04, 1.36]   |
| 9.1 3 to 4 months after randomization                             | 11 | 1225 | Risk Ratio (M-H, Fixed, 95% CI)           | 1.12 [0.98, 1.29]   |
| 9.2 Up to 8 weeks/2 months after randomization                    | 2  | 81   | Risk Ratio (M-H, Fixed, 95% CI)           | 4.83 [1.81, 12.89]  |
| 10 Response (higher quality studies)                              | 5  | 977  | Risk Ratio (M-H, Random, 95% CI)          | 1.04 [0.89, 1.21]   |
| 11 Headache frequency (various measures - for funnel plot)        | 8  | 1012 | Std. Mean Difference (IV, Fixed, 95% CI)  | -0.10 [-0.22, 0.03] |
| 11.1 3 to 4 months after randomization                            | 8  | 1012 | Std. Mean Difference (IV, Fixed, 95% CI)  | -0.10 [-0.22, 0.03] |
| 12 Headache frequency (various measures - higher quality studies) | 5  | 888  | Std. Mean Difference (IV, Fixed, 95% CI)  | -0.03 [-0.16, 0.11] |
| 12.1 3 to 4 months after randomization                            | 5  | 888  | Std. Mean Difference (IV, Fixed, 95% CI)  | -0.03 [-0.16, 0.11] |

### Comparison 3. Acupuncture vs. drug treatment

| Outcome or subgroup title                      | No. of studies | No. of participants | Statistical method                        | Effect size          |
|------------------------------------------------|----------------|---------------------|-------------------------------------------|----------------------|
| 1 Response                                     | 2              |                     | Risk Ratio (M-H, Random, 95% CI)          | Subtotals only       |
| 1.1 Up to 8 weeks/2 months after randomization | 2              | 566                 | Risk Ratio (M-H, Random, 95% CI)          | 1.35 [1.09, 1.67]    |
| 1.2 3 to 4 months after randomization          | 2              | 566                 | Risk Ratio (M-H, Random, 95% CI)          | 1.20 [0.98, 1.46]    |
| 1.3 5 to 6 months after randomization          | 2              | 564                 | Risk Ratio (M-H, Random, 95% CI)          | 1.35 [0.89, 2.05]    |
| 1.4 > 6 months after randomization             | 0              | 0                   | Risk Ratio (M-H, Random, 95% CI)          | Not estimable        |
| 2 Headache frequency (various measures)        | 4              |                     | Std. Mean Difference (IV, Random, 95% CI) | Subtotals only       |
| 2.1 Up to 8 weeks/2 months after randomization | 3              | 653                 | Std. Mean Difference (IV, Random, 95% CI) | -0.24 [-0.40, -0.08] |
| 2.2 3 to 4 months after randomization          | 4              | 780                 | Std. Mean Difference (IV, Random, 95% CI) | -0.26 [-0.41, -0.11] |

|                                                |   |     |                                           |                      |
|------------------------------------------------|---|-----|-------------------------------------------|----------------------|
| 2.3 5 to 6 months after randomization          | 3 | 714 | Std. Mean Difference (IV, Random, 95% CI) | -0.20 [-0.35, -0.05] |
| 2.4 > 6 months after randomization             | 0 | 0   | Std. Mean Difference (IV, Random, 95% CI) | Not estimable        |
| 3 Migraine attacks                             | 3 |     | Mean Difference (IV, Random, 95% CI)      | Subtotals only       |
| 3.1 Up to 8 weeks/2 months after randomization | 2 | 241 | Mean Difference (IV, Random, 95% CI)      | -0.49 [-0.91, -0.08] |
| 3.2 3 to 4 months after randomization          | 3 | 316 | Mean Difference (IV, Random, 95% CI)      | -0.32 [-0.59, -0.04] |
| 3.3 5 to 6 months after randomization          | 2 | 237 | Mean Difference (IV, Random, 95% CI)      | -0.47 [-1.22, 0.28]  |
| 3.4 > 6 months after randomization             | 0 | 0   | Mean Difference (IV, Random, 95% CI)      | Not estimable        |
| 4 Migraine days                                | 2 |     | Mean Difference (IV, Random, 95% CI)      | Subtotals only       |
| 4.1 Up to 8 weeks/2 months after randomization | 2 | 503 | Mean Difference (IV, Random, 95% CI)      | -0.58 [-1.09, -0.07] |
| 4.2 3 to 4 months after randomization          | 2 | 553 | Mean Difference (IV, Random, 95% CI)      | -0.70 [-1.23, -0.17] |
| 4.3 5 to 6 months after randomization          | 2 | 564 | Mean Difference (IV, Random, 95% CI)      | -0.66 [-1.18, -0.13] |
| 4.4 > 6 months after randomization             | 0 | 0   | Mean Difference (IV, Random, 95% CI)      | Not estimable        |
| 5 Headache days                                | 1 |     | Mean Difference (IV, Random, 95% CI)      | Subtotals only       |
| 5.1 Up to 8 weeks/2 months after randomization | 1 | 91  | Mean Difference (IV, Random, 95% CI)      | 0.10 [-1.26, 1.46]   |
| 5.2 3 to 4 months after randomization          | 1 | 89  | Mean Difference (IV, Random, 95% CI)      | -0.10 [-1.52, 1.32]  |
| 5.3 5 to 6 months after randomization          | 1 | 87  | Mean Difference (IV, Random, 95% CI)      | -0.60 [-1.99, 0.79]  |
| 5.4 > 6 months after randomization             | 0 | 0   | Mean Difference (IV, Random, 95% CI)      | Not estimable        |
| 6 Headache intensity                           | 3 |     | Std. Mean Difference (IV, Random, 95% CI) | Subtotals only       |
| 6.1 Up to 8 weeks/2 months after randomization | 0 | 0   | Std. Mean Difference (IV, Random, 95% CI) | Not estimable        |
| 6.2 3 to 4 months after randomization          | 3 | 639 | Std. Mean Difference (IV, Random, 95% CI) | -0.37 [-0.75, 0.02]  |
| 6.3 5 to 6 months after randomization          | 2 | 565 | Std. Mean Difference (IV, Random, 95% CI) | -0.41 [-0.81, -0.01] |
| 6.4 > 6 months after randomization             | 0 | 0   | Std. Mean Difference (IV, Random, 95% CI) | Not estimable        |
| 7 Analgesic use                                | 2 |     | Std. Mean Difference (IV, Random, 95% CI) | Subtotals only       |
| 7.1 Up to 8 weeks/2 months after randomization | 2 | 241 | Std. Mean Difference (IV, Random, 95% CI) | -0.22 [-0.53, 0.08]  |
| 7.2 3 to 4 months after randomization          | 2 | 239 | Std. Mean Difference (IV, Random, 95% CI) | -0.08 [-0.33, 0.18]  |
| 7.3 5 to 6 months after randomization          | 2 | 237 | Std. Mean Difference (IV, Random, 95% CI) | -0.09 [-0.35, 0.17]  |
| 7.4 > 6 months after randomization             | 0 | 0   | Std. Mean Difference (IV, Random, 95% CI) | Not estimable        |
| 8 Headache scores                              | 1 |     | Std. Mean Difference (IV, Random, 95% CI) | Subtotals only       |

|                                                           |   |     |                                           |                     |
|-----------------------------------------------------------|---|-----|-------------------------------------------|---------------------|
| 8.1 Up to 8 weeks/2 months after randomization            | 1 | 91  | Std. Mean Difference (IV, Random, 95% CI) | -0.08 [-0.50, 0.34] |
| 8.2 3 to 4 months after randomization                     | 1 | 89  | Std. Mean Difference (IV, Random, 95% CI) | -0.16 [-0.59, 0.27] |
| 8.3 5 to 6 months after randomization                     | 1 | 87  | Std. Mean Difference (IV, Random, 95% CI) | -0.23 [-0.67, 0.20] |
| 8.4 > 6 months after randomization                        | 0 | 0   | Std. Mean Difference (IV, Random, 95% CI) | Not estimable       |
| 9 Number of patients reporting adverse effects            | 4 | 838 | Odds Ratio (M-H, Fixed, 95% CI)           | 0.47 [0.34, 0.65]   |
| 10 Number of patients dropping out due to adverse effects | 2 | 191 | Odds Ratio (M-H, Fixed, 95% CI)           | 0.10 [0.01, 0.78]   |

#### Comparison 4. Acupuncture vs. other therapy

| Outcome or subgroup title                      | No. of studies | No. of participants | Statistical method                        | Effect size    |
|------------------------------------------------|----------------|---------------------|-------------------------------------------|----------------|
| 1 Response                                     | 0              |                     | Risk Ratio (M-H, Random, 95% CI)          | Subtotals only |
| 1.1 Up to 8 weeks/2 months after randomization | 0              | 0                   | Risk Ratio (M-H, Random, 95% CI)          | Not estimable  |
| 1.2 3 to 4 months after randomization          | 0              | 0                   | Risk Ratio (M-H, Random, 95% CI)          | Not estimable  |
| 1.3 5 to 6 months after randomization          | 0              | 0                   | Risk Ratio (M-H, Random, 95% CI)          | Not estimable  |
| 1.4 > 6 months after randomization             | 0              | 0                   | Risk Ratio (M-H, Random, 95% CI)          | Not estimable  |
| 2 Headache frequency (various measures)        | 2              |                     | Std. Mean Difference (IV, Random, 95% CI) | Subtotals only |
| 2.1 Up to 8 weeks/2 months after randomization | 2              | 47                  | Std. Mean Difference (IV, Random, 95% CI) | Not estimable  |
| 2.2 3 to 4 months after randomization          | 1              | 20                  | Std. Mean Difference (IV, Random, 95% CI) | Not estimable  |
| 2.3 5 to 6 months after randomization          | 0              | 0                   | Std. Mean Difference (IV, Random, 95% CI) | Not estimable  |
| 2.4 > 6 months after randomization             | 1              | 17                  | Std. Mean Difference (IV, Random, 95% CI) | Not estimable  |
| 3 Migraine attacks                             | 0              |                     | Mean Difference (IV, Random, 95% CI)      | Subtotals only |
| 3.1 Up to 8 weeks/2 months after randomization | 0              | 0                   | Mean Difference (IV, Random, 95% CI)      | Not estimable  |
| 3.2 3 to 4 months after randomization          | 0              | 0                   | Mean Difference (IV, Random, 95% CI)      | Not estimable  |
| 3.3 5 to 6 months after randomization          | 0              | 0                   | Mean Difference (IV, Random, 95% CI)      | Not estimable  |
| 3.4 > 6 months after randomization             | 0              | 0                   | Mean Difference (IV, Random, 95% CI)      | Not estimable  |
| 4 Migraine days                                | 0              |                     | Mean Difference (IV, Random, 95% CI)      | Subtotals only |

|                                                |   |    |                                           |                |
|------------------------------------------------|---|----|-------------------------------------------|----------------|
| 4.1 Up to 8 weeks/2 months after randomization | 0 | 0  | Mean Difference (IV, Random, 95% CI)      | Not estimable  |
| 4.2 3 to 4 months after randomization          | 0 | 0  | Mean Difference (IV, Random, 95% CI)      | Not estimable  |
| 4.3 5 to 6 months after randomization          | 0 | 0  | Mean Difference (IV, Random, 95% CI)      | Not estimable  |
| 4.4 > 6 months after randomization             | 0 | 0  | Mean Difference (IV, Random, 95% CI)      | Not estimable  |
| 5 Headache days                                | 0 |    | Mean Difference (IV, Random, 95% CI)      | Subtotals only |
| 5.1 Up to 8 weeks/2 months after randomization | 0 | 0  | Mean Difference (IV, Random, 95% CI)      | Not estimable  |
| 5.2 3 to 4 months after randomization          | 0 | 0  | Mean Difference (IV, Random, 95% CI)      | Not estimable  |
| 5.3 5 to 6 months after randomization          | 0 | 0  | Mean Difference (IV, Random, 95% CI)      | Not estimable  |
| 5.4 > 6 months after randomization             | 0 | 0  | Mean Difference (IV, Random, 95% CI)      | Not estimable  |
| 6 Headache intensity                           | 0 |    | Std. Mean Difference (IV, Random, 95% CI) | Subtotals only |
| 6.1 Up to 8 weeks/2 months after randomization | 0 | 0  | Std. Mean Difference (IV, Random, 95% CI) | Not estimable  |
| 6.2 3 to 4 months after randomization          | 0 | 0  | Std. Mean Difference (IV, Random, 95% CI) | Not estimable  |
| 6.3 5 to 6 months after randomization          | 0 | 0  | Std. Mean Difference (IV, Random, 95% CI) | Not estimable  |
| 6.4 > 6 months after randomization             | 0 | 0  | Std. Mean Difference (IV, Random, 95% CI) | Not estimable  |
| 7 Analgesic use                                | 1 |    | Std. Mean Difference (IV, Random, 95% CI) | Subtotals only |
| 7.1 Up to 8 weeks/2 months after randomization | 1 | 20 | Std. Mean Difference (IV, Random, 95% CI) | Not estimable  |
| 7.2 3 to 4 months after randomization          | 1 | 20 | Std. Mean Difference (IV, Random, 95% CI) | Not estimable  |
| 7.3 5 to 6 months after randomization          | 0 | 0  | Std. Mean Difference (IV, Random, 95% CI) | Not estimable  |
| 7.4 > 6 months after randomization             | 1 | 20 | Std. Mean Difference (IV, Random, 95% CI) | Not estimable  |
| 8 Headache scores                              | 0 |    | Std. Mean Difference (IV, Random, 95% CI) | Subtotals only |
| 8.1 Up to 8 weeks/2 months after randomization | 0 | 0  | Std. Mean Difference (IV, Random, 95% CI) | Not estimable  |
| 8.2 3 to 4 months after randomization          | 0 | 0  | Std. Mean Difference (IV, Random, 95% CI) | Not estimable  |
| 8.3 5 to 6 months after randomization          | 0 | 0  | Std. Mean Difference (IV, Random, 95% CI) | Not estimable  |
| 8.4 > 6 months after randomization             | 0 | 0  | Std. Mean Difference (IV, Random, 95% CI) | Not estimable  |
